# Supplementary material
Source: publisher site journal article supplement (https://www.dovepress.com/article/367458)
Supplement: Supplementary file 1 [file get_supplementary_file.php]

## Figures and tables for the supplementary material

**Table S1. Local healthcare service costs**

| Category           | Service                         | Cost per use (in euros) |          |          |          | Assumptions                                                                  | Source              |
|--------------------|---------------------------------|-------------------------|----------|----------|----------|------------------------------------------------------------------------------|---------------------|
|                    |                                 | France                  | Germany  | Italy    | Spain    |                                                                              |                     |
| Ambulance call out | Ambulance Call out              | 459.11 €                | 459.11 € | 459.11 € | 459.11 € | Based on NHS 2017 data cost = dispatch + taking a patient to hospital charge | (1)                 |
| Hospital visits    | Overnight stay                  | 397.58 €                | 233.94 € | 200.00 € | 486.28 € |                                                                              | (2),(3),(4),<br>(5) |
|                    | Day patient / visited for tests | 23.93 €                 | 102.72 € | 102.72 € | 204.18 € | Costs for 1 day shown. Assumed 1/2 day per visit.                            | (5)                 |

| Category          | Service           | Cost per use (in euros) |          |          |         | Assumptions                                                                 | Source   |
|-------------------|-------------------|-------------------------|----------|----------|---------|-----------------------------------------------------------------------------|----------|
|                   |                   | France                  | Germany  | Italy    | Spain   |                                                                             |          |
| Specialist visits | Internal Medicine | 307.63 €                | 307.63 € | 307.63 € | 88.81 € | Assumed same for France, Germany and Italy                                  | (4), (5) |
|                   | Haematology       | 307.63 €                | 475.14 € | 307.63 € | 88.81 € |                                                                             | (4), (5) |
| Other HCP visits  | GP                | 167.90 €                | 167.90 € | 167.90 € | 48.22 € |                                                                             | (4), (5) |
|                   | Specialist Nurse  | 80.00 €                 | 80.00 €  | 80.00 €  | 22.84 € | FR. DE, IT calculated based on relative difference vs Spain across measures | (5)      |
|                   | Practice Nurse    | 80.00 €                 | 80.00 €  | 80.00 €  | 22.84 € | FR. DE, IT calculated based on relative difference                          | (5)      |

| Category | Service              | Cost per use (in euros) |          |          |          | Assumptions                                   | Source    |
|----------|----------------------|-------------------------|----------|----------|----------|-----------------------------------------------|-----------|
|          |                      | France                  | Germany  | Italy    | Spain    |                                               |           |
|          |                      |                         |          |          |          | vs Spain across measures                      |           |
|          | Telehealth advice    | 226.76 €                | 226.76 € | 226.76 € | 226.76 € | Based on NHS data                             | (10),(11) |
|          | Physiotherapist      | 83.06 €                 | 95.43 €  | 83.06 €  | 12.38 €  |                                               | (5)       |
|          | Occupational therapy | 83.06 €                 | 95.43 €  | 83.06 €  | 71.91 €  | Assumed = physiotherapist costs in FR, GE, IT | (5)       |
|          | Osteopath            | 83.06 €                 | 95.43 €  | 83.06 €  | 12.38 €  | Assumed = physiotherapist costs in FR, GE, IT | (5)       |
|          | Chiropractor         | 83.06 €                 | 95.43 €  | 83.06 €  | 12.38 €  | Assumed = physiotherapist costs in FR, GE, IT | (5)       |

| Category              | Service                                               | Cost per use (in euros) |          |          |          | Assumptions                                         | Source   |
|-----------------------|-------------------------------------------------------|-------------------------|----------|----------|----------|-----------------------------------------------------|----------|
|                       |                                                       | France                  | Germany  | Italy    | Spain    |                                                     |          |
|                       | Massage Therapist                                     | 83.06 €                 | 95.43 €  | 83.06 €  | 12.38 €  | Assumed =<br>physiotherapist<br>costs in FR, GE, IT | (5)      |
|                       | Psychologist                                          | 65.50 €                 | 42.19 €  | 65.50 €  | 88.81 €  |                                                     | (5), (6) |
|                       | Psychiatrist                                          | 147.90 €                | 207.00 € | 147.90 € | 88.81 €  |                                                     | (5), (7) |
|                       | Dietician                                             | 23.69 €                 | 35.00 €  | 23.69 €  | 12.38 €  |                                                     | (5), (8) |
|                       | Radiology                                             | 71.00 €                 | 71.26 €  | 28.52 €  | 114.27 € |                                                     | (4),(5)  |
|                       | Complementary /<br>alternative health care<br>workers | 83.06 €                 | 95.43 €  | 83.06 €  | 12.38 €  | Same as Massage<br>Therapist                        | (5)      |
| Community<br>Services | District / community<br>nurse                         | 80.00 €                 | 80.00 €  | 80.00 €  | 22.84 €  | Assumed same cost<br>as practice nurse              |          |

| Category | Service                        | Cost per use (in euros) |         |         |         | Assumptions            | Source |
|----------|--------------------------------|-------------------------|---------|---------|---------|------------------------|--------|
|          |                                | France                  | Germany | Italy   | Spain   |                        |        |
|          | Health visitor                 | 30.09 €                 | 27.57 € | 18.27 € | 18.27 € | Minimum wage x 3 hours | (9)    |
|          | Professional home help / carer | 30.09 €                 | 27.57 € | 18.27 € | 18.27 € | Minimum wage x 3 hours | (9)    |
|          | House cleaner                  | 30.09 €                 | 27.57 € | 18.27 € | 18.27 € | Minimum wage x 3 hours | (9)    |
|          | Meals on wheels                | 10.03 €                 | 9.19 €  | 6.09 €  | 6.09 €  | Minimum wage x 1 hours | (9)    |
|          | Social worker                  | 10.03 €                 | 9.19 €  | 6.09 €  | 6.09 €  | Minimum wage x 1 hours | (9)    |
|          | Day care / rehabilitation      | 40.12 €                 | 36.76 € | 24.36 € | 24.36 € | Minimum wage x 4 hours | (9)    |

| Category    | Service                              | Cost per use (in euros) |         |         |         | Assumptions                                | Source |
|-------------|--------------------------------------|-------------------------|---------|---------|---------|--------------------------------------------|--------|
|             |                                      | France                  | Germany | Italy   | Spain   |                                            |        |
|             | Helper from a voluntary organisation | 30.09 €                 | 27.57 € | 18.27 € | 18.27 € | Minimum wage x 3 hours                     | (9)    |
|             | Night nurse                          | 80.24 €                 | 73.52 € | 48.72 € | 48.72 € | Minimum wage x 8 hours                     | (9)    |
| Salary data | Minimum wage (2019)                  | 30.09 €                 | 27.57 € | 18.27 € | 18.27 € | No Minimum in Italy. Assumed same as Spain | (9)    |

GE, Germany; GP, general practice; FR, France; HCP, health care professionals; IT, Italy. Currency conversions used: £1: €1.133

Sources:

1. National Audit Office and NHS England; NHS Ambulance Services (2017) <https://www.nao.org.uk/wp-content/uploads/2017/01/NHS-Ambulance-Services.pdf>,

2. Legifrance, "Arrêté du 28 février 2012 fixant pour l'année 2012 les éléments tarifaires mentionnés aux I et IV de l'article L. 162-22-10 du code de la sécurité sociale et aux IV et V de l'article 33 modifié de la loi de financement de la sécurité sociale pour 2004. » (2012); 51, 3581

[https://www.legifrance.gouv.fr/affichTexte.do%3Bjsessionid%3D3E7798D70773D40F58B9F53F961661F6.tpdjo03v\\_2?cidTexte=JORFTEXT000025413804&dateTexte=&oldAction=rechJO&categorieLien=id&idJO=JORFCONT000025413457](https://www.legifrance.gouv.fr/affichTexte.do%3Bjsessionid%3D3E7798D70773D40F58B9F53F961661F6.tpdjo03v_2?cidTexte=JORFTEXT000025413804&dateTexte=&oldAction=rechJO&categorieLien=id&idJO=JORFCONT000025413457)

| Category | Service | Cost per use (in euros) |         |       |       | Assumptions | Source                                                                                                                                                                                                                                                                                                                                                                                                   |
|----------|---------|-------------------------|---------|-------|-------|-------------|----------------------------------------------------------------------------------------------------------------------------------------------------------------------------------------------------------------------------------------------------------------------------------------------------------------------------------------------------------------------------------------------------------|
|          |         | France                  | Germany | Italy | Spain |             |                                                                                                                                                                                                                                                                                                                                                                                                          |
|          |         |                         |         |       |       |             | 3. Ashcroft, John, et al. "Assessing Outcomes, Healthcare Resource Utilisation and Costs across Europe in Newly Diagnosed Multiple Myeloma (NDMM) Patients Post Autologous Stem Cell Transplant (ASCT)." (2017): 4709-4709., <a href="http://www.bloodjournal.org/content/130/Suppl_1/4709">http://www.bloodjournal.org/content/130/Suppl_1/4709</a>                                                     |
|          |         |                         |         |       |       |             | 4. Petrucci, Maria Teresa, et al. "Cost of illness in patients with multiple myeloma in Italy: the CoMiM study." Tumori Journal 99.4 (2013): e193-e202. <a href="http://citeseerx.ist.psu.edu/viewdoc/download?doi=10.1.1.660.7655&amp;rep=rep1&amp;type=pdf">http://citeseerx.ist.psu.edu/viewdoc/download?doi=10.1.1.660.7655&amp;rep=rep1&amp;type=pdf</a>                                            |
|          |         |                         |         |       |       |             | 5. Durán, I., et al. "Cost analysis of skeletal-related events in Spanish patients with bone metastases from solid tumours." Clinical and Translational Oncology 16.3 (2014): 322-329. <a href="https://link.springer.com/article/10.1007/s12094-013-1077-2">https://link.springer.com/article/10.1007/s12094-013-1077-2</a>                                                                             |
|          |         |                         |         |       |       |             | 6. <a href="https://www.kbv.de/html/ebm.php">https://www.kbv.de/html/ebm.php</a>                                                                                                                                                                                                                                                                                                                         |
|          |         |                         |         |       |       |             | 7. Wolff, Jan, et al. "Hospital costs associated with psychiatric comorbidities: a retrospective study." BMC health services research 18.1 (2018): 67. <a href="https://bmchealthservres.biomedcentral.com/articles/10.1186/s12913-018-2892-5">https://bmchealthservres.biomedcentral.com/articles/10.1186/s12913-018-2892-5</a>                                                                         |
|          |         |                         |         |       |       |             | 8. Krankenkassen Deutschland; Ernährungsberatung: Was Krankenkassen zahlen (2019) <a href="https://www.krankenkassen.de/gesetzliche-krankenkassen/leistungen-gesetzliche-krankenkassen/praevention-vorsorge-krankenkassen/ernaehrungsberatung/">https://www.krankenkassen.de/gesetzliche-krankenkassen/leistungen-gesetzliche-krankenkassen/praevention-vorsorge-krankenkassen/ernaehrungsberatung/</a>  |
|          |         |                         |         |       |       |             | 9. Eurofound, Minimum wages in 2019 – First findings (2019) <a href="https://www.eurofound.europa.eu/publications/article/2019/minimum-wages-in-2019-first-findings">https://www.eurofound.europa.eu/publications/article/2019/minimum-wages-in-2019-first-findings</a>                                                                                                                                  |
|          |         |                         |         |       |       |             | 10. NHS Choices. Are benefits of telehealthcare worth the cost? (2013) <a href="https://www.nhs.uk/news/medical-practice/are-benefits-of-telehealth-care-worth-the-cost/">https://www.nhs.uk/news/medical-practice/are-benefits-of-telehealth-care-worth-the-cost/</a>                                                                                                                                   |
|          |         |                         |         |       |       |             | 11. Henderson C, Knapp M, Fernández JL, et al. Cost effectiveness of telehealth for patients with long term conditions (Whole Systems Demonstrator telehealth questionnaire study): nested economic evaluation in a pragmatic, cluster randomised controlled trial. BMJ. Published online March 22 2013. <a href="http://www.bmj.com/content/346/bmj.f1035">http://www.bmj.com/content/346/bmj.f1035</a> |

**Table S2. Sample distribution of patients and carers across the participating countries at each study timepoint**

|                                                                                                                                                                                                                                                                                                      | France      | Germany    | Italy      | Spain      | Total     |
|------------------------------------------------------------------------------------------------------------------------------------------------------------------------------------------------------------------------------------------------------------------------------------------------------|-------------|------------|------------|------------|-----------|
| <b>Sample size of patients</b>                                                                                                                                                                                                                                                                       |             |            |            |            |           |
| Month 0                                                                                                                                                                                                                                                                                              | 37          | 47         | 76         | 4          | 164       |
| Month 3                                                                                                                                                                                                                                                                                              | 36          | 40         | 78         | 6          | 160       |
| Month 12                                                                                                                                                                                                                                                                                             | 26          | 54         | 102        | 8          | 190       |
| <b>Completed all 3 timepoints*</b>                                                                                                                                                                                                                                                                   | <b>23</b>   | <b>18</b>  | <b>47</b>  | <b>3</b>   | <b>91</b> |
| <b>Sample size of carers</b>                                                                                                                                                                                                                                                                         |             |            |            |            |           |
| Month 0                                                                                                                                                                                                                                                                                              | 27          | 40         | 60         | 4          | 131       |
| Month 3                                                                                                                                                                                                                                                                                              | 24          | 32         | 60         | 6          | 122       |
| Month 12                                                                                                                                                                                                                                                                                             | 26          | 32         | 60         | 6          | 124       |
| <b>Completed all 3 timepoints*</b>                                                                                                                                                                                                                                                                   | <b>11</b>   | <b>18</b>  | <b>40</b>  | <b>3</b>   | <b>72</b> |
| Number of physicians that recruited                                                                                                                                                                                                                                                                  | 5           | 2          | 7          | 4          | -         |
| % of patients with a linked carer taking part at Month 0                                                                                                                                                                                                                                             | <b>100%</b> | <b>59%</b> | <b>59%</b> | <b>75%</b> | -         |
| <p>Month 0: as soon as possible after diagnosis and prior to treatment initiation; Month 3: three months after diagnosis; Month 12: twelve months after diagnosis.</p> <p>*Sample at 'all timepoints' were those patients who have completed all questionnaires (Month 0, Month 3 and Month 12).</p> |             |            |            |            |           |



**Figure S1. Treatment regimens for TNE NDMM patients for the total sample and per participating country at study Month 3 and Month 12**

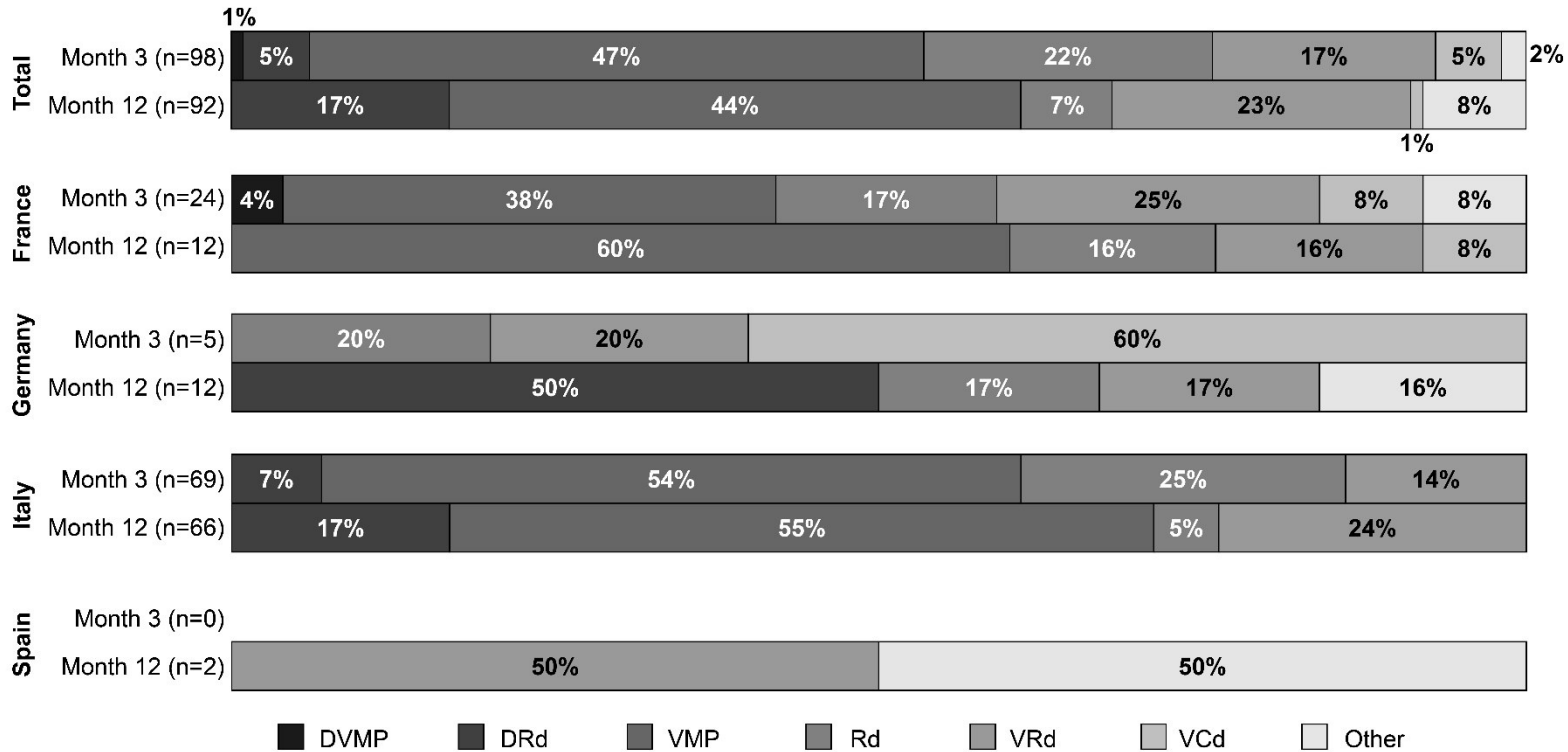

DRd: daratumumab, lenalidomide, and dexamethasone; DVMP: daratumumab, bortezomib, melphalan and prednisolone; pt: patients; Month 3: three months after diagnosis; Month 12: twelve months after diagnosis; NDMM, newly diagnosed multiple myeloma; Rd: lenalidomide and dexamethasone; TNE, transplant non-eligible; VCd: bortezomib, cyclophosphamide and dexamethasone; VMP: bortezomib, melphalan and prednisolone; VRd: bortezomib, lenalidomide and dexamethasone;

Statistically significant differences:

VMP (26%) \*pt 65+>pt under 65; \*pt 65-75>pt 55-64, pt 75+; \*pt multi>pt not comorb; \*Pt poor health>pt somewhat healthy.

Rd (13%) \*IT>DE; \*pt under 65>pt 65+; \*pt 55-64>pt 65-75.

VRd (10%) \*FR>DE; \*pt male>pt female.

VCd (3%) \*pt 75+>pt 65-75.

Statistically significant differences\*

VMP (26%) \*Patient 65+ > Patient under 65; \* Patient 65-75 > Patient 55-64, pt 75+; \*Patient with comorbidity > Patient with no comorbidity; \*Patient poor health > Patient somewhat healthy.

Rd (13%) \*IT>DE; \*Patient under 65 > Patient 65+; \*Patient 55-64 > Patient 65-75.

VRd (10%) \*FR>DE; \*Patient male > Patient female.

VCd (3%) \*Patient 75+ > Patient 65-75.
